# Supplementary material for: Development of a dynamic interactive web tool to enhance understanding of multi-state model analyses: MSMplus
Source: Springer Nature journal article supplement (doi:10.1186/s12874-021-01420-9), 2021-11-27
Supplement: MOESM1 [file 19906770]

# Additional file 1 for “Development of a dynamic interactive web tool to enhance understanding of multi-state model analyses: MSMplus”

Nikolaos Skourlis<sup>1\*</sup>, Michael J. Crowther<sup>1</sup>, Therese M-L. Andersson<sup>1</sup>, Paul C. Lambert<sup>1,2</sup>

<sup>1</sup> Department of Medical Epidemiology and Biostatistics, Karolinska Institutet, Nobels Väg 12A, Stockholm, Sweden.

<sup>2</sup> Biostatistics Research Group, Department of Health Sciences, University of Leicester, University Road, Leicester, UK.

\* Correspondence: nikolaos.skourlis@ki.se; Tel.: +46-7387-30-384

Stata code for fitting the multi-state models on the EBMT dataset and for deriving the Summary information and the analysis results input files for the web tool MSMplus using the Stata commands msboxes and predictms.

## Code- Stata

```
/* Example of creating json files as input for the MSMplus in Stata*/

/* Install the current editions of merlin and multistate
net install merlin, from ("https://www.mjcrowther.co.uk/code/ merlin")
net install multistate, from ("https://www.mjcrowther.co.uk/code /multistate/")
*/
clear all

// Upload data
import delimited "... path\ebmt.csv", clear
save "ebmt.dta ",replace

// Regenerate the covariates of interest as binary
tab age , gen (ag)

// Check the time and status variables
list id prtime prstat rfstime rfsstat if inlist (id,9,2199),noobs sepby(id)

// Mset the data
msset, id(id) times ( prtime rfstime ) states ( prstat rfsstat ) covariates ( ag2 ag3 )

// Define the transition matrix
mat tmat = r( transmatrix )

// Specify timevar
range tt 0 10 101

// Run the msboxes command
msboxes, transmatrix ( tmat ) id(id) xvalues(0.2 0.7 0.45) yvalues (0.7 0.7 0.2) ///
    statenames("(1)Transplant" "(2)Platelet recovery" "(3)Relapse or death") ///
    transnames("h1" "h2" "h3") freqat (tt) scale (365.25) interactive jsonpath ("$$N \4. Json_files ")

// stset the data for the MSM model
stset _stop , enter ( _start ) failure ( _status =1) scale (365.25)

// Define the transition specific models
```

```

stmerlin ag2 ag3 if _trans ==1 , distribution (rp) df (4)
estimate store m1
stmerlin ag2 ag3 if _trans ==2 , distribution (rp) df (4)
estimate store m2
stmerlin ag2 ag3 if _trans ==3 , distribution (rp) df (4) noorthog
estimates store m3

// Specify user function (optional)
mata:
real matrix ufunc (M)
{
    los2 = ms_user_los (M ,2)
    return ( los1 :+ los2 )
}
End

//Feed the models, time variable, tmat and covariate patterns into predictms
predictms , transmatrix( tmat ) models (m1 m2 m3) timevar (tt) ///
    at1(ag2 0 ag3 0) at2( ag2 0 ag3 1) at3( ag2 1 ag3 1) ///
    probability hazard los visit userfunction(ufunc) simulate latent ///
    diff ratio ci m(200) n(100000) from(1 2) interactive jsonpath("$N\4.Json_files")

```
