# Supplementary material for: Development of a dynamic interactive web tool to enhance understanding of multi-state model analyses: MSMplus
Source: Springer Nature journal article supplement (doi:10.1186/s12874-021-01420-9), 2021-11-27
Supplement: MOESM6 [file 19906770]

# Additional file 6 for “Development of a dynamic interactive web tool to enhance understanding of multi-state model analyses: MSMplus”

Nikolaos Skourlis<sup>1\*</sup>, Michael J. Crowther<sup>1</sup>, Therese M-L. Andersson<sup>1</sup>, Paul C. Lambert<sup>1,2</sup>

<sup>1</sup> Department of Medical Epidemiology and Biostatistics, Karolinska Institutet, Nobels Väg 12A, Stockholm, Sweden.

<sup>2</sup> Biostatistics Research Group, Department of Health Sciences, University of Leicester, University Road, Leicester, UK.

\* Correspondence: nikolaos.skourlis@ki.se; Tel.: +46-7387-30-384

| List of HTML tag elements used in MSMplus app                                                                                                                                                                                                                                                                                                                                                                                                                                                                                                                                                                                                                                                                                                                                                |
|----------------------------------------------------------------------------------------------------------------------------------------------------------------------------------------------------------------------------------------------------------------------------------------------------------------------------------------------------------------------------------------------------------------------------------------------------------------------------------------------------------------------------------------------------------------------------------------------------------------------------------------------------------------------------------------------------------------------------------------------------------------------------------------------|
| <pre>tags\$style(type = "text/css", ".navbar-nav {     display: -webkit-box;     display: -ms-flexbox;     -webkit-box-orient: horizontal!important;     -webkit-box-direction: normal;     -ms-flex-direction: column;     flex-direction: column;     padding-left: 0px;     margin-bottom: 0px;     list-style: none; }")</pre>                                                                                                                                                                                                                                                                                                                                                                                                                                                           |
| <pre>tags\$style(type = "text/css", ".form-control {     display: block;     width: 100%;     height: calc(1.5em + 0.75rem + 2px);     padding: 0.375rem 0.75rem;     font-size: 2rem !important;     font-weight: 400;     line-height: 1.5;     color: #495057;     background-color: #fff;     background-clip: padding-box;     border: 1px solid #ced4da;     border-radius: 0.25rem;     -webkit-transition: border-color 0.15s ease-in-out, - webkit-box-shadow 0.15s ease-in-out;     transition: border-color 0.15s ease-in-out, -webkit-box- shadow 0.15s ease-in-out;     transition: border-color 0.15s ease-in-out, box-shadow 0.15s ease-in-out;     transition: border-color 0.15s ease-in-out, box-shadow 0.15s ease-in-out, -webkit-box-shadow 0.15s ease-in-out; }")</pre> |
| <pre>tags\$style(type = "text/css", ".btn {     display: inline-block;     font-weight: 400;     color: #495057;     text-align: center;     vertical-align: middle;     cursor: pointer;     -webkit-user-select: none;     -moz-user-select: none;     -ms-user-select: none;     user-select: none; }")</pre>                                                                                                                                                                                                                                                                                                                                                                                                                                                                             |

```

        background-color: transparent;
        border: 1px solid transparent;
        padding: 0.375rem 0.75rem;
        font-size: 2rem !important;
        line-height: 1.5;
        border-radius: 0.25rem;
        -webkit-transition: color 0.15s ease-in-out, background-
color 0.15s ease-in-out, border-color 0.15s ease-in-out, -webkit-box-shadow
0.15s ease-in-out;
        transition: color 0.15s ease-in-out, background-color
0.15s ease-in-out, border-color 0.15s ease-in-out, -webkit-box-shadow 0.15s
ease-in-out;
        transition: color 0.15s ease-in-out, background-color
0.15s ease-in-out, border-color 0.15s ease-in-out, box-shadow 0.15s ease-in-
out;
        transition: color 0.15s ease-in-out, background-color
0.15s ease-in-out, border-color 0.15s ease-in-out, box-shadow 0.15s ease-in-
out, -webkit-box-shadow 0.15s ease-in-out;
    })
tags$style('body {font-size: 20px;}'),
tags$style(HTML(type='file', "shiny-input-container{font-size:
12pt !important;}")),
tags$style("input[type=checkbox] {transform: scale(2);}"),
tags$style("input[type=number] {font-size: 20px;}"),
tags$style("input[type=file] {font-size: 20px;}"),
tags$style(type = "text/css", ".download_this{ height:40px;
width:57px;color:blue; padding-top: 15px;}"),
tags$style(type = "text/css", ".upload_this{ height:40px;
width:57px;color:blue; padding-top: 15px;}"),
tags$style('input[type=radio] {border: 1px;width: 80%; height:
1em;}'),
tags$style(type="text/css", "select { width: 400px; }"),
tags$style(type="text/css", "textarea { max-height: 400px;
}"),
tags$style(type='text/css', ".well { max-height: 400px; }"),
tags$style(type='text/css', ".span4 { max-height: 400px; }"),
tags$style(type="text/css", "select.shiny-bound-input { font-
size:20px; height:35px !important;}"),
tags$style(type="text/css", "input.shiny-bound-input { font-
size:20px; height:35px !important;}"),
tags$style(type="text/css", "shiny-output-error-myClass {
font-size:20px; height:21px;}"),
tags$style(HTML(".shiny-output-error-validation {color:
green;}")),
tags$style(type="text/css", "select { max-width: 150px; max-
height: 100px;}"),
tags$style(type="text/css", "textarea { max-width: 150px; max-
height: 100px; }"),
tags$style(type='text/css', ".well { max-width: 200px; max-
height: 100px;}"),
tags$style(type='text/css', ".span4 { max-width: 250px; max-height:
100px;}"),
tags$style( ".k-numeric-wrap input {height: 40px;}"),

```

```

tags$style(type = "text/css", ".irs-grid-text {font-family:
'arial'; color: black; font-size: 20px;}"),
tags$style(type = "text/css", ".custom-file-input::before {
content: 'Select file';
display: inline-block;
background: linear-gradient(top, #f9f9f9, #e3e3e3);
border: 1px solid #999;
border-radius: 3px;
padding: 5px 8px;
outline: none;
white-space: nowrap;
-webkit-user-select: none;
cursor: pointer;
text-shadow: 1px 1px #fff;
font-weight: 700;
font-size: 15pt
!important;}")
tags$style(type="text/css",
".shiny-output-error { visibility: hidden; }",
".shiny-output-error:before { visibility: hidden; }"
)
tags$style(HTML(type="text/css", ".jslider { max-width: 200px; max-
height: 100px;}")),
tags$style(HTML(type='text/css', ".irs-grid-text { font-size: 15pt;
}")),
tags$style(HTML(type="text/css", "input.shiny-bound-input { font-
size:20px; height:35px !important;}")),
tags$style(HTML(type="text/css","shiny-html-output{ font-size:20px;
height:25px;}")),
tags$style("#frequency {font-size:20px;}"),
tags$style(HTML(type='number',"irs-grid-text { font-size: 12pt
!important; }")),
tags$style(type="text/css",
".shiny-output-error { visibility: hidden; }",
".shiny-output-error:before { visibility: hidden; }"
)
tags$style(type="text/css",".nav li a.disabled { background-
color: #aaa !important;color: #333 !important;cursor: not-allowed
!important;border-color: #aaa !important;}"),

```
